# Supplementary material for: A robust photoluminescence screening assay identifies uracil-DNA glycosylase inhibitors against prostate cancer
Source: Chem Sci. 2020 Jan 10;11(7):1750–60. doi: 10.1039/c9sc05623h (PMC8148385; doi:10.1039/c9sc05623h)
Supplement: SC-011-C9SC05623H-s001 [file SC-011-C9SC05623H-s001.xlsx]

## Sheet: Sheet1
Compounds		Smiles
Indole
A1		OC1(C2=CC=CC=C2)/C(N(S(=O)(C3=CC=C(C)C=C3)=O)C4=C1C=C(Cl)C=C4)=C/C5=CC=CC=C5
A2		OC1(C2=CC=C(C)C=C2)/C(N(S(=O)(C3=CC=C(C)C=C3)=O)C4=C1C=CC=C4)=C/C5=CC=CC=C5
A3		OC1(C2=CC=C(Cl)C=C2)/C(N(S(=O)(C3=CC=C(C)C=C3)=O)C4=C1C=CC=C4)=C/C5=CC=CC=C5
A4		OC1(C2=CC=CC=C2)/C(N(S(=O)(C3=CC=C(C)C=C3)=O)C4=C1C=CC=C4)=C/C5=CC=C(C)C=C5
A5		OC1(C2=CC=CC=C2)/C(N(S(=O)(C3=CC=C(C)C=C3)=O)C4=C1C=CC=C4)=C/C5CC5
A6		OC1(C2=CC=CC=C2)C(N(S(=O)(C3=CC=C(C)C=C3)=O)C4=C1C=CC=C4)=C
A7		OC1/C(N(S(=O)(C2=CC=C(C)C=C2)=O)C3=C1C=CC=C3)=C/C4=CC=CC=C4
A8		OC1(C2=CC=CC=C2)/C(N(S(=O)(C3=CC=C([N+]([O-])=O)C=C3)=O)C4=C1C=CC=C4)=C/C5=CC=CC=C5
A9		OC1(C2=CC=CC=C2)/C(N(S(=O)(C3=CC=C(C)C=C3)=O)C4=C1C=C(C=CC=C5)C5=C4)=C/C6=CC=CC=C6
Azepine
B1		C=CC1=CC=C([C@]([C@H](CC2=CC=CC=C2)N(S(C3=CC=C(C)C=C3)(=O)=O)CC=C4)(OC(C5=CC=CC=C5)=O)C4=C6C7=CC=CC=C7)C6=C1
B2		O=C(C1=CC=CC=C1)O[C@@]23C4=CC=CC=C4C(C5=CC=C(C)C=C5)=C2C=CCN(S(C6=CC=C(C)C=C6)(=O)=O)[C@H]3CC7=CC=CC=C7
B3		O=C(C1=CC=CC=C1)O[C@@]23C4=CC=CC=C4C(C5=CC=C(Br)C=C5)=C2C=CCN(S(C6=CC=C(C)C=C6)(=O)=O)[C@H]3CC7=CC=CC=C7
B4		CC[C@H]1[C@]2(OC(C3=CC=CC=C3)=O)C4=CC=CC=C4C(C5=CC=CC=C5)=C2C=CCN1S(C6=CC=C(C)C=C6)(=O)=O
B5	Quetiapine	OCCOCCN(CC1)CCN1C2=NC3=CC=CC=C3SC4=C2C=CC=C4
B6	Trimipramine (maleate)	CC(CN(C)C)CN1C2=C(C=CC=C2)CCC3=C1C=CC=C3.O=C(O)/C=C\C(O)=O
B7	Loxapine	CN1CCN(C2=NC3=CC=CC=C3OC4=CC=C(Cl)C=C24)CC1
B8	Loxapine (succinate)	O=C(O)CCC(O)=O.CN1CCN(C2=NC3=CC=CC=C3OC4=CC=C(Cl)C=C24)CC1
B9	Cilazapril (monohydrate)	O=C([C@@H]1CCCN2N1C([C@@H](N[C@H](C(OCC)=O)CCC3=CC=CC=C3)CCC2)=O)O.O
B10	Carbamazepine	O=C(N1C2=CC=CC=C2C=CC3=CC=CC=C31)N
B11	Tolvaptan	O=C(C1=CC=CC=C1C)NC2=CC=C(C(C)=C2)C(N3CCCC(C4=CC(Cl)=CC=C43)O)=O
B12	Eslicarbazepine (acetate)	O=C(N1C2=CC=CC=C2C[C@H](OC(C)=O)C3=CC=CC=C31)N
B13	Diltiazem (hydrochloride)	CN(C)CCN1C2=CC=CC=C2S[C@@H](C3=CC=C(OC)C=C3)[C@@H](OC(C)=O)C1=O.Cl
B14	Clozapine	CN1CCN(CC1)C2=NC3=CC(Cl)=CC=C3NC4=CC=CC=C42
B15	Desipramine hydrochloride	CNCCCN1C2=CC=CC=C2CCC3=CC=CC=C31.[H]Cl
B16	Flumazenil	O=C(C1=C2CN(C(C3=CC(F)=CC=C3N2C=N1)=O)C)OCC
B17	Alcaftadine	O=CC1=CN=C2N1CCC3=CC=CC=C3/C2=C4CCN(C)CC\4
B18	Pirenzepine (dihydrochloride)	O=C1NC2=CC=CN=C2N(C(CN3CCN(C)CC3)=O)C4=CC=CC=C14.[H]Cl.[H]Cl
B19	Amoxapine	ClC1=CC=C(OC2=CC=CC=C2N=C3N4CCNCC4)C3=C1
B20	Imipramine (hydrochloride)	CN(C)CCCN1C2=CC=CC=C2CCC3=CC=CC=C31.[H]Cl
Azabicyclo[4.2.0]octan
C1		CC1=CC=C(S(N2CC3=C(C4=CC=CC=C4)[C@](C5=CC=CC=C5)(OC(C6=CC=CC=C6)=O)C3=C(C7=CC=CC=C7)/C2=C\C8=CC=CC=C8)(=O)=O)C=C1
C2		CC1=CC=C(S(N2CC3=C(C4=CC=CC=C4)[C@@](OC(C5=CC=CC=C5)=O)(C6=CSC=C6)C3=C(C7=CC=CC=C7)C2CC8=CC=CC=C8)(=O)=O)C=C1
C3		CC1=CC=C(S(N2CC3=C(C4=CC=CC=C4)[C@@](OC(C5=CC=CC=C5)=O)(C6=CC=CC=C6)C3=C(C7=CC=CC=C7)[C@@H]2C8=CC=CC=C8)(=O)=O)C=C1
C4		CC1=CC=C(S(N2CC3=C(C4=CC=CC=C4)[C@](C5=CC=CC=C5)(OC(C6=CC=CC=C6)=O)C3=C(C7=CC=CC=C7)[C@@H]2CO[Si](C)(C)C(C)(C)C)(=O)=O)C=C1
C5		CC1=CC=C(S(N2CC3=C(C4=CC=CC=C4)[C@](C5=CC=CC=C5)(OC(C6=CC=CC=C6)=O)C3=C(C7=CC=CC=C7)[C@@H]2CCC)(=O)=O)C=C1
C6	Moxalactam (sodium salt)	O=C(C(N12)=C(CSC3=NN=NN3C)CO[C@]2([H])[C@](OC)(NC([C@H](C([O-])=O)C4=CC=C(O)C=C4)=O)C1=O)[O-].[Na+].[Na+]
C7	Cefamandole (nafate)	O=C(C(N12)=C(CSC3=NN=NN3C)CS[C@]2([H])[C@H](NC([C@H](OC=O)C4=CC=CC=C4)=O)C1=O)[O-].[Na+]
C8	Cefazolin (sodium)	O=C(C(N12)=C(CSC3=NN=C(C)S3)CS[C@]2([H])[C@H](NC(CN4N=NN=C4)=O)C1=O)[O-].[Na+]
C9	Cefdinir	O=C(C(N12)=C(C=C)CS[C@]2([H])[C@H](NC(/C(C3=CSC(N)=N3)=N\O)=O)C1=O)O
C10	Cefotaxime (sodium salt)	O=C(C(N12)=C(COC(C)=O)CS[C@]2([H])[C@H](NC(/C(C3=CSC(N)=N3)=N\OC)=O)C1=O)[O-].[Na+]
Aziridine
D1		CCOC(C1(CN1S(C2=CC=C(C)C=C2)(=O)=O)C(C3=CC=C(F)C=C3)=O)=O
D2		CCOC(C1(CN1S(C2=CC=C(C)C=C2)(=O)=O)C(C3=CC=C(Cl)C=C3)=O)=O
D3		CCOC(C1(CN1S(C2=CC=C(C)C=C2)(=O)=O)C(C3=CC=C(Br)C=C3)=O)=O
D4		CC(C1(C(C)N1S(C2=CC=C(C)C=C2)(=O)=O)C(OCC)=O)=O
D5		CCOC(C1(C(C)N1S(C2=CC=C(C)C=C2)(=O)=O)C(C(C)C)=O)=O
D6		CC(C1(C(CCCC)N1S(C2=CC=C(C)C=C2)(=O)=O)C(OC)=O)=O
D7		CCOC(C1(CN1S(C2=CC=C(C)C=C2)(=O)=O)C(OCC)=O)=O
D8		CCOC(C1(CN1S(C2=CC=C(C)C=C2)(=O)=O)C(C3CC3)=O)=O
D9		CCOC(C1(C(C)N1S(C2=CC=C(C)C=C2)(=O)=O)C(OCC)=O)=O
D10		CCOC(C1(C(CC)N1S(C2=CC=C(C)C=C2)(=O)=O)C(OCC)=O)=O
D11		CCOC(C1(C(CCCl)N1S(C2=CC=C(C)C=C2)(=O)=O)C(OCC)=O)=O
D12		CC(C1(CN1S(C2=CC=C(C)C=C2)(=O)=O)C(C3=CC=CC=C3)=O)=O
D13		CC(C1(C(C)N1S(C2=CC=C(C)C=C2)(=O)=O)C(C)=O)=O
D14		O=C(C1=CC=CC=C1)C2(CN2S(C3=CC=C(C)C=C3)(=O)=O)C(OCC)=O
D15	Thio-TEPA
β-amino acids
E1		O=C(C)C(C(C)NS(C1=CC=C(C)C=C1)(=O)=O)C(OCC)=O
E2		O=C(OCC)C(C(COCl)NS(C1=CC=C(C)C=C1)(=O)=O)C(OCC)=O
Purine
F1	Proxyphylline	O=C(N1C)N(C)C2=C(N(CC(O)C)C=N2)C1=O
F2	Istradefylline	O=C1C2=C(N=C(/C=C/C3=CC(OC)=C(OC)C=C3)N2C)N(CC)C(N1CC)=O
F3	6-Thioguanine	SC1=NC(N)=NC2=C1N=CN2
F4	Etofylline	O=C(N1C)N(C)C2=C(N(CCO)C=N2)C1=O
F5	Idelalisib	O=C1N(C2=CC=CC=C2)C([C@@H](NC3=C4N=CNC4=NC=N3)CC)=NC5=C1C(F)=CC=C5
F6	Valganciclovir (hydrochloride)	N[C@@H](C(C)C)C(OCC(OCN1C=NC2=C1N=C(N)NC2=O)CO)=O.[H]Cl
F7	Entecavir (monohydrate)	O=C1NC(N)=NC2=C1N=CN2[C@@H]3C([C@H](CO)[C@@H](O)C3)=C.O
F8	Adefovir dipivoxil	NC1=C2N=CN(CCOCP(OCOC(C(C)(C)C)=O)(OCOC(C(C)(C)C)=O)=O)C2=NC=N1
F9	Abacavir	NC1=NC(NC2CC2)=C3N=CN([C@H]4C=C[C@@H](CO)C4)C3=N1
F10	Ganciclovir	O=C1NC(N)=NC2=C1N=CN2COC(CO)CO
F11	Bucladesine (sodium salt)	O=C(CCC)O[C@H]1[C@H](N2C(N=CN=C3NC(CCC)=O)=C3N=C2)O[C@@](CO4)([H])[C@@]1([H])OP4([O-])=O.[Na+]
1,2-dihydroquinoline
G1		ClC1=CC(C2=CC(C)N(S(C3=CC=C(C)C=C3)(=O)=O)C4=CC5=CC=CC=C5C=C42)=CC=C1
G2		CC1N(S(C2=CC=C(C)C=C2)(=O)=O)C3=CC4=CC=CC=C4C=C3C(C5=CC=C(OC)C=C5)=C1
G3		CC1N(S(C2=CC=C(C)C=C2)(=O)=O)C3=CC4=C(C=CC=C4)C=C3C(C5=C(C)C=CC=C5)=C1
G4		CC1N(S(C2=CC=C(C)C=C2)(=O)=O)C3=CC4=CC=CC=C4C=C3C(C5=CC=CS5)=C1
G5		CC1N(S(C2=CC=C(C)C=C2)(=O)=O)C3=CC4=CC=CC=C4C=C3C(C5=CC(C)=CC(C)=C5)=C1
G6		CC1N(S(C2=CC=C(C)C=C2)(=O)=O)C3=CC4=CC=CC=C4C=C3C(C5=CC=C(CC)C=C5)=C1
G7		FC(C=C1)=CC=C1C2=CC(C)N(S(C3=CC=C(C)C=C3)(=O)=O)C4=CC5=CC=CC=C5C=C42
G8		CC1N(S(C2=CC=C(C)C=C2)(=O)=O)C3=CC4=CC=CC=C4C=C3C(C5=C(C=CC=C6)C6=CC=C5)=C1
Morpholine
H1	Moroxydine (hydrochloride)	N=C(N1CCOCC1)NC(N)=N.Cl
H2	Molsidomine	O=C([N-]C1=C[N+](N2CCOCC2)=NO1)OCC
H3	Doxapram (hydrochloride hydrate)	O=C1N(CC)CC(CCN2CCOCC2)C1(C3=CC=CC=C3)C4=CC=CC=C4.Cl.O
Piperidine
I1	Cisapride	ClC1=C(N)C=C(OC)C(C(N[C@H]2[C@@H](OC)CN(CCCOC3=CC=C(F)C=C3)CC2)=O)=C1.[relative stereochemistry]
I2	Pimavanserin tartrate	O=C(NCC1=CC=C(OCC(C)C)C=C1)N(CC2=CC=C(F)C=C2)C3CCN(C)CC3.O=C(O)[C@H](O)[C@@H](O)C(O)=O.O=C(NCC4=CC=C(OCC(C)C)C=C4)N(CC5=CC=C(F)C=C5)C6CCN(C)CC6
I3	Prucalopride (succinate)	O=C(O)CCC(O)=O.O=C(C1=C(OCC2)C2=C(N)C(Cl)=C1)NC3CCN(CCCOC)CC3
I4	Cyproheptadine (hydrochloride)	CN1CC/C(CC1)=C2C3=CC=CC=C3C=CC4=CC=CC=C/24.Cl
I5	Alectinib	N#CC1=CC2=C(C3=C(N2)C(C)(C4=CC(N5CCC(CC5)N6CCOCC6)=C(C=C4C3=O)CC)C)C=C1
I6	Linagliptin	O=C1N(C2=C(C(N1CC3=NC(C)=C4C=CC=CC4=N3)=O)N(CC#CC)C(N5CCC[C@@H](N)C5)=N2)C
I7	Raloxifene (hydrochloride)	O=C(C1=C(C2=CC=C(O)C=C2)SC3=CC(O)=CC=C31)C4=CC=C(OCCN5CCCCC5)C=C4.Cl
I8	Irinotecan	O=C(N1CCC(N2CCCCC2)CC1)OC3=CC=C4N=C5C(CN6C(C(COC([C@@]7(CC)O)=O)=C7C=C65)=O)=C(CC)C4=C3
I9	Vandetanib	FC1=CC(Br)=CC=C1NC2=NC=NC3=CC(OCC4CCN(CC4)C)=C(C=C23)OC
I10	Trelagliptin (succinate)	O=C(C=C(N1C[C@H](N)CCC1)N2CC3=C(C#N)C=CC(F)=C3)N(C)C2=O.O=C(O)CCC(O)=O
I11	Clebopride (malate)	O=C(O)C(O)CC(O)=O.O=C(NC1CCN(CC2=CC=CC=C2)CC1)C3=CC(Cl)=C(N)C=C3OC
I12	Paliperidone	CC1=C(C(N2CCCC(C2=N1)O)=O)CCN3CCC(CC3)C4=NOC5=C4C=CC(F)=C5
I13	Haloperidol	ClC(C=C1)=CC=C1C2(O)CCN(CCCC(C3=CC=C(F)C=C3)=O)CC2
I14	Roxatidine (Acetate Hydrochloride)	O=C(NCCCOC1=CC=CC(CN2CCCCC2)=C1)COC(C)=O.Cl
I15	Azatadine (dimaleate)	O=C(O)/C=C\C(O)=O.O=C(O)/C=C\C(O)=O.CN1CC/C(CC1)=C2C3=CC=CC=C3CCC4=CC=CN=C4\2
I16	Diphenylpyraline (hydrochloride)	CN1CCC(OC(C2=CC=CC=C2)C3=CC=CC=C3)CC1.[H]Cl
I17	Lenalidomide	O=C1C2=CC=CC(N)=C2CN1C(C(N3)=O)CCC3=O
I18	Flavoxate (hydrochloride)	O=C(C1=C2C(C(C(C)=C(C3=CC=CC=C3)O2)=O)=CC=C1)OCCN4CCCCC4.Cl
I19	Diphenidol (hydrochloride)	OC(C1=CC=CC=C1)(C2=CC=CC=C2)CCCN3CCCCC3.[H]Cl
I20	Alvimopan (dihydrate)	OC1=CC=CC([C@@]2(C)[C@@H](C)CN(C[C@H](CC3=CC=CC=C3)C(NCC(O)=O)=O)CC2)=C1.O.O
I21	Troxipide	O=C(NC1CNCCC1)C2=CC(OC)=C(OC)C(OC)=C2
I22	Miglustat (hydrochloride)	O[C@H]1[C@H](O)[C@@H](CO)N(CCCC)C[C@@H]1O.[H]Cl
I23	Repaglinide	CC(C)C[C@H](NC(CC1=CC(OCC)=C(C(O)=O)C=C1)=O)C2=CC=CC=C2N3CCCCC3
I24	Minoxidil	NC1=NC(N2CCCCC2)=CC(N)=[N+]1[O-]
I25	Flecainide (acetate)	O=C(NCC1NCCCC1)C2=CC(OCC(F)(F)F)=CC=C2OCC(F)(F)F.CC(O)=O
I26	Lenalidomide (hemihydrate)	O=C1N(C2C(NC(CC2)=O)=O)CC3=C(N)C=CC=C31.[0.5 H2O]
I27	Thalidomide	O=C1N(C2CCC(NC2=O)=O)C(C3=CC=CC=C31)=O
1H-benzo[b]azepine
J1		O=C1CN(C2=C(C=CC=C2)C=C1C)S(C3=CC=C(C)C=C3)(=O)=O
J2		O=C1CN(C2=C(C=CC(OC)=C2)C=C1)S(C3=CC=C(C)C=C3)(=O)=O
J3		O=C1CN(C2=C(C=CC=C2OC)C=C1)S(C3=CC=C(C)C=C3)(=O)=O
J4		O=C1CN(C2=C(C=C(OCO3)C3=C2)C=C1)S(C4=CC=C(C)C=C4)(=O)=O
J5		O=C1CN(C2=C(C=C(OC)C(OC)=C2)C=C1)S(C3=CC=C(C)C=C3)(=O)=O
J6		O=C1CN(C2=C(C=C(Cl)C=C2)C=C1)S(C3=CC=C(C)C=C3)(=O)=O
J7		O=C1CN(C2=C(C=CC=C2Cl)C=C1)S(C3=CC=C(C)C=C3)(=O)=O
J8		O=C1CN(C2=C(C=C(C=CC=C3)C3=C2)C=C1)S(C4=CC=C(C)C=C4)(=O)=O
J9		O=C1CN(C2=C(C=CC=C2)C=C1)S(C3=CC=C(C)C=C3)(=O)=O
Oxolane
K1	Naftidrofuryl (oxalate)	O=C(OCCN(CC)CC)C(CC1=C2C=CC=CC2=CC=C1)CC3OCCC3.O=C(O)C(O)=O
K2	Regadenoson	OC[C@@H]1[C@H]([C@H]([C@H](N2C=NC3=C2N=C(N4N=CC(C(NC)=O)=C4)N=C3N)O1)O)O
K3	Doxofylline	O=C(N1C)N(C)C2=C(N(CC3OCCO3)C=N2)C1=O
K4	Alfuzosin	O=C(C1OCCC1)NCCCN(C2=NC(N)=C3C=C(OC)C(OC)=CC3=N2)C
K5	Cytarabine	O=C1N=C(N)C=CN1[C@H]2[C@H]([C@@H]([C@@H](CO)O2)O)O
K6	Gemcitabine	O=C1N(C=CC(N)=N1)[C@H]2C(F)([C@@H]([C@H](O2)CO)O)F
K7	Gemcitabine (Hydrochloride)	OC[C@@H]1[C@H](C(F)(F)[C@H](N2C(N=C(C=C2)N)=O)O1)O.[H]Cl
K8	Fludarabine	NC1=C2C(N([C@H]3[C@@H](O)[C@H](O)[C@@H](COP(O)(O)=O)O3)C=N2)=NC(F)=N1
K9	Uridin	OC[C@@H]1[C@H]([C@H]([C@H](N2C(NC(C=C2)=O)=O)O1)O)O
K10	Clevudine	O=C(C(C)=CN1[C@H]2O[C@@H](CO)[C@H](O)[C@H]2F)NC1=O
K11	Ribavirin	O[C@H]1[C@H](N2N=C(C(N)=O)N=C2)O[C@H](CO)[C@H]1O
K12	Didanosine	OC[C@@H]1CC[C@H](N2C=NC3=C2N=CN=C3O)O1
K13	Trifluridine	O=C1C(C(F)(F)F)=CN([C@@H]2O[C@H](CO)[C@@H](O)C2)C(N1)=O
K14	Nelarabine	NC1=NC(OC)=C2N=CN([C@H]3[C@H]([C@@H]([C@@H](CO)O3)O)O)C2=N1
K15	Fludarabine (phosphate)	NC1=C2C(N([C@H]3[C@@H](O)[C@H](O)[C@@H](COP(O)(O)=O)O3)C=N2)=NC(F)=N1
K16	Doxifluridine	C[C@@H]1[C@H]([C@H]([C@H](N2C(NC(C(F)=C2)=O)=O)O1)O)O
K17	Fursultiamine	O=CN(CC1=CN=C(C)N=C1N)/C(C)=C(SSCC2OCCC2)\CCO
K18	Mizoribine	O[C@@H]1[C@@H](CO)O[C@@H](N2C(O)=C(C(N)=O)N=C2)[C@@H]1O
K19	Empagliflozin	ClC(C=CC([C@@H]1O[C@H](CO)[C@@H](O)[C@H](O)[C@H]1O)=C2)=C2CC(C=C3)=CC=C3O[C@H]4CCOC4
Imidazole
L1	Alosetron (Hydrochloride)	O=C(C(C1=C2C=CC=C1)=C(N2C)CC3)N3CC4=C(NC=N4)C.[H]Cl
L2	Clonidine (hydrochloride)	ClC1=C(NC2=NCCN2)C(Cl)=CC=C1.Cl
L3	Tolazoline (hydrochloride)	[H]Cl.C1(CC2=CC=CC=C2)=NCCN1
L4	Eprosartan (mesylate)	OC(/C(CC1=CC=CS1)=C/C2=CN=C(CCCC)N2CC3=CC=C(C(O)=O)C=C3)=O.CS(=O)(O)=O
L5	Nilotinib	O=C(NC1=CC(C(F)(F)F)=CC(N2C=NC(C)=C2)=C1)C3=CC=C(C)C(NC4=NC=CC(C5=CC=CN=C5)=N4)=C3
L6	Tinidazole	CC1=NC=C([N+]([O-])=O)N1CCS(=O)(CC)=O
L7	Nitrofurantoin	O=C1NC(CN1/N=C/C2=CC=C([N+]([O-])=O)O2)=O
L8	Furagin	O=C1NC(CN1/N=C/C=C/C2=CC=C(O2)[N+]([O-])=O)=O
L9	Bleomycin (sulfate)	NC(C[C@H](NC[C@@H](N)C(N)=O)C1=NC(N)=C(C)C(C(N[C@H](C(N[C@@H](C)[C@@H]([C@@H](C)C(N[C@@H](C(NCCC2=NC(C3=NC(C(NCCC[S+](C)C)=O)=CS3)=CS2)=O)[C@H](O)C)=O)O)=O)C(C4=CNC=N4)O[C@@H]5[C@]([H])(O[C@@H]6[C@@H](O)[C@@H](OC(N)=O)[C@H](O)[C@@H](CO)O6)[C@H](O)[C@@H](O)[C@@H](CO)O5)=O)=N1)=O.[O-]S(=O)(O)=O
L10	Isoconazole (nitrate)	ClC1=C(COC(C2=CC=C(Cl)C=C2Cl)CN3C=CN=C3)C(Cl)=CC=C1.O[N+]([O-])=O
L11	Metronidazole	OCCN1C([N+]([O-])=O)=CN=C1C
L12	Histamine	NCCC1=CN=CN1
L13	Ozagrel	O=C(O)/C=C/C1=CC=C(CN2C=CN=C2)C=C1
L14	Sulconazole (nitrate)	[O-][N+](O)=O.ClC1=CC=C(C(SCC2=CC=C(Cl)C=C2)CN3C=CN=C3)C(Cl)=C1
L15	Luliconazole	ClC1=CC(Cl)=CC=C1[C@@H]2CS/C(S2)=C(C#N)\N3C=CN=C3
L16	Tioconazole	ClC1=CC=C(C(OCC2=C(Cl)SC=C2)CN3C=CN=C3)C(Cl)=C1
L17	Etomidate	O=C(C1=CN=CN1[C@@H](C2=CC=CC=C2)C)OCC
L18	Daclatasvir	O=C([C@@H](NC(OC)=O)C(C)C)N1CCC[C@H]1C2=NC=C(N2)C3=CC=C(C=C3)C4=CC=C(C5=CN=C([C@@H]6CCCN6C([C@@H](NC(OC)=O)C(C)C)=O)N5)C=C4
L19	Moxonidine	CC1=NC(OC)=C(NC2=NCCN2)C(Cl)=N1
L20	Imidafenacin	NC(C(C1=CC=CC=C1)(C2=CC=CC=C2)CCN3C(C)=NC=C3)=O
L21	Dacarbazine	O=C(C1=C(/N=N/N(C)C)NC=N1)N
L22	Nimorazole	O=[N+](C1=CN=CN1CCN2CCOCC2)[O-]
L23	Secnidazole	OC(C)CN1C([N+]([O-])=O)=CN=C1C
L24	Phenytoin	O=C1NC(C(C2=CC=CC=C2)(C3=CC=CC=C3)N1)=O
L25	Vardenafil (hydrochloride)	CCCC1=NC(C)=C2N1N=C(C(C=C(S(=O)(N3CCN(CC)CC3)=O)C=C4)=C4OCC)NC2=O.Cl
Oxazole
M1	Sulfisoxazole	O=S(C1=CC=C(N)C=C1)(NC2=C(C)C(C)=NO2)=O
M2	Zonisamide	O=S(CC1=NOC2=C1C=CC=C2)(N)=O
M3	Valdecoxib	O=S(C1=CC=C(C2=C(C)ON=C2C3=CC=CC=C3)C=C1)(N)=O
M4	Oxaprozin	O=C(O)CCC1=NC(C2=CC=CC=C2)=C(C3=CC=CC=C3)O1
M5	Rivaroxaban	O=C(N(C1=CC=C(N2C(COCC2)=O)C=C1)C3)O[C@H]3CNC(C4=CC=C(S4)Cl)=O
Benzimidazole
N1	Flibanserin	O=C1NC2=CC=CC=C2N1CCN3CCN(C4=CC=CC(C(F)(F)F)=C4)CC3
N2	Ramosetron (Hydrochloride)	O=C(C1=CN(C)C2=C1C=CC=C2)[C@@H](C3)CCC4=C3NC=N4.Cl
N3	Pantoprazole (sodium)	O=S(C1=NC2=CC=C(OC(F)F)C=C2[N-]1)CC3=NC=CC(OC)=C3OC.[Na+]
N4	Bendamustine (hydrochloride)	CN1C(C=CC(N(CCCl)CCCl)=C2)=C2N=C1CCCC(O)=O.Cl
N5	Droperidol	O=C1NC2=CC=CC=C2N1C3=CCN(CCCC(C4=CC=C(F)C=C4)=O)CC3
N6	Albendazole	O=C(OC)NC1=NC2=CC=C(SCCC)C=C2N1
N7	Lansoprazole	O=S(C1=NC2=CC=CC=C2N1)CC3=NC=CC(OCC(F)(F)F)=C3C
N8	Rabeprazole (sodium)	O=S(C1=NC2=CC=CC=C2N1)CC3=NC=CC(OCCCOC)=C3C.[Na+]
Naphthalene
O1	Agomelatine	CC(NCCC1=C2C=C(OC)C=CC2=CC=C1)=O
O2	Naftopidil	OC(CN1CCN(C(C=CC=C2)=C2OC)CC1)COC3=CC=CC4=CC=CC=C34
O3	Tetrahydrozoline (hydrochloride)	C1(C2CCCC3=C2C=CC=C3)=NCCN1.Cl
O4	Naproxen (sodium)	[O-]C([C@@H](C)C1=CC2=CC=C(OC)C=C2C=C1)=O.[Na+]
O5	Naftifine (hydrochloride)	CN(C/C=C/C1=CC=CC=C1)CC2=CC=CC3=CC=CC=C23.Cl
O6	Terbinafine	CN(C/C=C/C#CC(C)(C)C)CC1=C2C=CC=CC2=CC=C1
O7	Butenafine (Hydrochloride)	CN(CC1=CC=C(C(C)(C)C)C=C1)CC2=C3C=CC=CC3=CC=C2.[H]Cl
O8	Pravastatin (sodium)	O[C@@H](C[C@@H](O)CC([O-])=O)CC[C@@H]([C@H](C=C1)C)[C@@](C1=C[C@@H](O)C2)([H])[C@H]2OC([C@@H](C)CC)=O.[Na+]
O9	Menadione bisulfite (sodium)	O=S(C(CC(C1=C2C=CC=C1)=O)(C)C2=O)([O-])=O.[Na+]
O10	Lesinurad	BrC1=NN=C(SCC(O)=O)N1C2=C3C(C=CC=C3)=C(C4CC4)C=C2
Piperazine
P1	Cariprazine (hydrochloride)	O=C(N[C@H]1CC[C@H](CCN2CCN(C3=CC=CC(Cl)=C3Cl)CC2)CC1)N(C)C.[H]Cl
P2	Dasatinib (hydrochloride)	O=C(C1=CN=C(S1)NC2=NC(C)=NC(N3CCN(CC3)CCO)=C2)NC4=C(C=CC=C4Cl)C.[H]Cl
P3	Ranolazine (dihydrochloride)	O=C(NC1=C(C)C=CC=C1C)CN2CCN(CC(O)COC3=CC=CC=C3OC)CC2.[H]Cl.[H]Cl
P4	Olaparib	O=C(C1=CC(CC(C2=C3C=CC=C2)=NNC3=O)=CC=C1F)N4CCN(C(C5CC5)=O)CC4
P5	Levofloxacin (hydrate)	O=C(C(C1=O)=CN2[C@@H](C)COC3=C(N4CCN(C)CC4)C(F)=CC1=C23)O.[0.5H2O]
P6	Gatifloxacin	CC1NCCN(C2=C(F)C=C3C(N(C4CC4)C=C(C(O)=O)C3=O)=C2OC)C1
P7	Ofloxacin	O=C(C(C1=O)=CN2C(C)COC3=C(N4CCN(C)CC4)C(F)=CC1=C23)O
P8	Enoxacin (hydrate)	O=C(C1=CN(CC)C2=C(C=C(F)C(N3CCNCC3)=N2)C1=O)O.[1.5H2O]
P9	Levofloxacin	O=C(C(C1=O)=CN2[C@@H](C)COC3=C(N4CCN(C)CC4)C(F)=CC1=C23)O
P10	Flunarizine (dihydrochloride)	FC1=CC=C(C(N2CCN(C/C=C/C3=CC=CC=C3)CC2)C4=CC=C(F)C=C4)C=C1.Cl.Cl
P11	Palbociclib (isethionate)	CC(C1=C(N2C3CCCC3)N=C(NC4=NC=C(N5CCNCC5)C=C4)N=C1)=C(C(C)=O)C2=O.OCCS(O)(=O)=O
P12	Palbociclib (hydrochloride)	O=C1C(C(C)=O)=C(C)C2=CN=C(NC3=NC=C(N4CCNCC4)C=C3)N=C2N1C5CCCC5.Cl
P13	Levodropropizine	OC[C@@H](O)CN1CCN(C2=CC=CC=C2)CC1
P14	Dropropizine	OCC(O)CN1CCN(C2=CC=CC=C2)CC1
P15	Dexrazoxane hydrochloride	C[C@H](N(C1)CC(NC1=O)=O)CN(C2)CC(NC2=O)=O.[xHCl]
Thiazole
Q1	Mirabegron	O=C(NC1=CC=C(CCNC[C@H](O)C2=CC=CC=C2)C=C1)CC3=CSC(N)=N3
Q2	Epalrestat	O=C(O)CN(C/1=O)C(SC1=C/C(C)=C/C2=CC=CC=C2)=S
Q3	Aztreonam	CC(C)(O/N=C(C1=CSC(N)=N1)\C(N[C@H]2[C@H](C)N(S(=O)(O)=O)C2=O)=O)C(O)=O
Q4	Cobicistat	CN(C(N[C@@H](CCN1CCOCC1)C(N[C@@H](CC2=CC=CC=C2)CC[C@@H](NC(OCC3=CN=CS3)=O)CC4=CC=CC=C4)=O)=O)CC5=CSC(C(C)C)=N5
Q1	Riluzole	NC1=NC2=CC=C(OC(F)(F)F)C=C2S1
Q2	Nizatidine	CN/C(NCCSCC1=CSC(CN(C)C)=N1)=C\[N+]([O-])=O
Q3	Pidotimod	O=C([C@H]1N(C([C@H](CC2)NC2=O)=O)CSC1)O
Q4	Thiamine monochloride	CC1=C(CCO)SC=[N+]1CC2=CN=C(C)N=C2N.[Cl-]
Q1	Levamisole (hydrochloride)	[H]Cl.C12=N[C@@H](C3=CC=CC=C3)CN1CCS2
Q2	Pioglitazone	O=C(N1)SC(CC2=CC=C(OCCC3=NC=C(CC)C=C3)C=C2)C1=O
Q3	Nitazoxanide	O=C(NC1=NC=C([N+]([O-])=O)S1)C2=CC=CC=C2OC(C)=O
Benzamide
R1	Itopride (hydrochloride)	O=C(NCC1=CC=C(OCCN(C)C)C=C1)C2=CC=C(OC)C(OC)=C2.Cl
R2	Procainamide (hydrochloride)	O=C(NCCN(CC)CC)C1=CC=C(N)C=C1.[H]Cl
R3	Procarbazine (Hydrochloride)	O=C(NC(C)C)C1=CC=C(CNNC)C=C1.Cl
R4	Osalmid	O=C(NC1=CC=C(O)C=C1)C2=CC=CC=C2O
R5	2-Ethoxybenzamide	O=C(N)C1=CC=CC=C1OCC
Benzoate
R6	Sodium Salicylate	O=C([O-])C1=CC=CC=C1O.[Na+]
R7	Sodium 4-aminosalicylate dihydrate	O=C(O[Na])C1=C(O)C=C(N)C=C1.O.O
R8	Fidaxomicin	O=C(C(C(O)=C(Cl)C(O)=C1Cl)=C1CC)O[C@H]([C@H](O[C@H]2OC/C(C(O[C@](C/C=C3C)([H])[C@H](O)C)=O)=C\C=C\C[C@@H](/C(C)=C\[C@H](CC)[C@@H](O[C@@](OC(C)(C)[C@@H](OC(C(C)C)=O)[C@@H]4O)([H])[C@H]4O)\C(C)=C/3)O)C)[C@@H]([C@@H]2OC)O
R9	Gabexate (mesylate)	O=C(OCC)C1=CC=C(OC(CCCCCNC(N)=N)=O)C=C1.CS(=O)(O)=O
R10	Trimebutine (maleate)	O=C(O)/C=C\C(O)=O.O=C(OCC(C1=CC=CC=C1)(N(C)C)CC)C2=CC(OC)=C(OC)C(OC)=C2
R11	Benzyl benzoate	O=C(OCC1=CC=CC=C1)C2=CC=CC=C2
R12	Tetracaine	O=C(OCCN(C)C)C1=CC=C(NCCCC)C=C1
Furan
S1	Isosorbide mononitrate	O=[N+]([O-])O[C@H]1[C@](OC[C@@H]2O)([H])[C@]2([H])OC1
S2	Isosorbide	O[C@H]1[C@]2([H])[C@]([C@@H](O)CO2)([H])OC1
S3	Citalopram (hydrobromide)	N#CC1=CC2=C(C(C3=CC=C(F)C=C3)(CCCN(C)C)OC2)C=C1.[H]Br
S4	Noscapine	O=C1O[C@H]([C@@H]2N(C)CCC3=C2C(OC)=C(OCO4)C4=C3)C5=C1C(OC)=C(OC)C=C5
S5	Furazolidone	O=C1OCCN1/N=C/C2=CC=C([N+]([O-])=O)O2
S6	Ledipasvir (D-tartrate)	O=C(OC)N[C@H](C(N([C@H](C1=NC=C(C2=CC(C(F)(F)C3=C4C=CC(C5=CC=C6N=C([C@H]7N(C([C@@H](NC(OC)=O)C(C)C)=O)[C@]8([H])CC[C@@]7([H])C8)NC6=C5)=C3)=C4C=C2)N1)C9)CC%109CC%10)=O)C(C)C.O[C@@H]([C@@H](C(O)=O)O)C(O)=O
S7	Nifuratel	O=C1OC(CSC)CN1/N=C/C2=CC=C([N+]([O-])=O)O2
S8	Ranitidine (hydrochloride)	CN/C(NCCSCC1=CC=C(CN(C)C)O1)=C\[N+]([O-])=O.Cl
S9	Ramelteon	O=C(NCC[C@H]1C2=C(C=CC3=C2CCO3)CC1)CC
S10	Tasimelteon	[H][C@]1(C2=C3C(OCC3)=CC=C2)[C@@](CNC(CC)=O)([H])C1
S11	Furosemide	O=C(O)C1=CC(S(=O)(N)=O)=C(Cl)C=C1NCC2=CC=CO2
S12	Vorapaxar	O=C(O[C@@H]1C)[C@@]2([H])[C@]1([H])[C@@H](/C=C/C3=NC=C(C=C3)C4=CC=CC(F)=C4)[C@]([C@](C5)([H])C2)([H])CC[C@H]5NC(OCC)=O
S13	Nifuroxazide	O=C(N/N=C/C1=CC=C([N+]([O-])=O)O1)C2=CC=C(O)C=C2
Thiadiazole
T1	(S)-Timolol (Maleate)	O[C@H](COC1=NSN=C1N2CCOCC2)CNC(C)(C)C.O=C(O)/C=C\C(O)=O
T2	Methazolamide	CC(/N=C1SC(S(=O)(N)=O)=NN/1C)=O
T3	Sulfamethizole	O=S(C1=CC=C(N)C=C1)(NC2=NN=C(C)S2)=O
Pyrazole
U1	Propyphenazone	O=C1N(C2=CC=CC=C2)N(C)C(C)=C1C(C)C
U2	Ruxolitinib (phosphate)	N#CC[C@H](C1CCCC1)N2N=CC(C3=C4C=CNC4=NC=N3)=C2.O=P(O)(O)O
Propanamide
V1	Flutamide	CC(C)C(NC1=CC=C([N+]([O-])=O)C(C(F)(F)F)=C1)=O
V2	Bicalutamide	FC1=CC=C(S(=O)(CC(O)(C(NC2=CC=C(C#N)C(C(F)(F)F)=C2)=O)C)=O)C=C1
V3	Pindolol	OC(CNC(C)C)COC1=CC=CC2=C1C=CN2
Pyrazine
W1	Bortezomib	OB(O)[C@H](CC(C)C)NC([C@@H](NC(C1=NC=CN=C1)=O)CC2=CC=CC=C2)=O
W2	Sitagliptin	O=C(N1CC2=NN=C(C(F)(F)F)N2CC1)C[C@H](N)CC3=CC(F)=C(F)C=C3F
W3	Acipimox	O=C(C1=C[N+]([O-])=C(C)C=N1)O
W4	Amiloride hydrochloride dihydrate	O=C(C1=NC(Cl)=C(N)N=C1N)NC(N)=N.[H]Cl.O.O
W5	Amiloride (hydrochloride)	O=C(C1=NC(Cl)=C(N)N=C1N)NC(N)=N.Cl
Oxazine
X1	Efavirenz	ClC1=CC=C(NC(O[C@]2(C#CC3CC3)C(F)(F)F)=O)C2=C1
Quinolizine
Y1	Tetrabenazine	O=C1[C@@H](CC(C)C)CN2CCC3=CC(OC)=C(OC)C=C3[C@]2([H])C1.[relative stereochemistry]
Y2	Valbenazine	O=C([C@@H](N)C(C)C)O[C@@H]1C[C@]2([H])C3=CC(OC)=C(OC)C=C3CCN2C[C@H]1CC(C)C
Pyridine
Z1	Ticlopidine (hydrochloride)	ClC1=CC=CC=C1CN2CCC3=C(C=CS3)C2.Cl
Z2	Isoniazid	O=C(C1=CC=NC=C1)NN
Z3	Isradipine	O=C(C1=C(C)NC(C)=C(C(OC(C)C)=O)C1C2=CC=CC3=NON=C23)OC
Z4	Nifedipine	O=C(C1=C(C)NC(C)=C(C(OC)=O)C1C2=CC=CC=C2[N+]([O-])=O)OC
Z5	Niacin	O=C(C1=CC=CN=C1)O
Z6	Vemurafenib	FC1=CC=C(C(F)=C1C(C2=CNC3=NC=C(C=C32)C4=CC=C(C=C4)Cl)=O)NS(CCC)(=O)=O
Z7	Prothionamide	S=C(C1=CC(CCC)=NC=C1)N
Z8	Ethionamide	S=C(C1=CC(CC)=NC=C1)N
Z9	Amlodipine (besylate)	O=C(C1=C(COCCN)NC(C)=C(C(OC)=O)C1C2=CC=CC=C2Cl)OCC.O=S(C3=CC=CC=C3)(O)=O
Z10	Etoricoxib	O=S(C1=CC=C(C2=CC(Cl)=CN=C2C3=CC=C(C)N=C3)C=C1)(C)=O
Z11	Vadadustat	O=C(O)CNC(C1=NC=C(C2=CC=CC(Cl)=C2)C=C1O)=O
Z12	Iproniazid (phosphate)	O=C(C1=CC=NC=C1)NNC(C)C.O=P(O)(O)O
Z13	Nikethamide	O=C(C1=CC=CN=C1)N(CC)CC
Z14	Pyridine-3,4-diamine	NC1=C(N)C=CN=C1
Z15	Topiroxostat	N#CC1=NC=CC(C2=NNC(C3=CC=NC=C3)=N2)=C1
Z16	Pyridostigmine (bromide)	C[N+]1=CC=CC(OC(N(C)C)=O)=C1.[Br-]
Z17	Fadrozole	N#CC1=CC=C(C2CCCC3=CN=CN23)C=C1
Z18	Ciclopirox	O=C1C=C(C)C=C(C2CCCCC2)N1O.NCCO
Z19	Tedizolid (phosphate)	O=C1O[C@@H](COP(O)(O)=O)CN1C2=CC=C(C3=CC=C(C4=NN(C)N=N4)N=C3)C(F)=C2
Z20	Tenoxicam	OC(C(SC=C1)=C1S2(=O)=O)=C(N2C)C(NC3=CC=CC=N3)=O
Z21	Ampiroxicam	O=C(OC(OC(C1=CC=CC=C12)=C(C(NC3=NC=CC=C3)=O)N(C)S2(=O)=O)C)OCC
Z22	Tripelennamine (hydrochloride)	CN(C)CCN(CC1=CC=CC=C1)C2=NC=CC=C2.[H]Cl
Z23	Mepyramine maleate	CN(C)CCN(CC1=CC=C(OC)C=C1)C2=NC=CC=C2.O=C(O)/C=C\C(O)=O
Z24	Doxylamine (succinate)	O=C(O)CCC(O)=O.CC(C1=NC=CC=C1)(C2=CC=CC=C2)OCCN(C)C
Z25	Enasidenib (mesylate)	CS(=O)(O)=O.CC(O)(C)CNC1=NC(C2=NC(C(F)(F)F)=CC=C2)=NC(NC3=CC(C(F)(F)F)=NC=C3)=N1
Z26	Bisacodyl	CC(OC1=CC=C(C(C2=CC=C(OC(C)=O)C=C2)C3=NC=CC=C3)C=C1)=O
Z27	Sodium Picosulfate	O=S(OC1=CC=C(C=C1)C(C2=CC=CC=N2)C3=CC=C(OS(=O)([O-])=O)C=C3)([O-])=O.[Na+].[Na+]
Z28	Gimeracil	O=C1C=C(O)C(Cl)=CN1
Z29	Deferiprone	O=C1C(O)=C(C)N(C)C=C1
Z30	Pirfenidone	O=C1C=CC(C)=CN1C2=CC=CC=C2
Z31	Latrepirdine (dihydrochloride)	CN(C1)CCC2=C1C3=CC(C)=CC=C3N2CCC4=CN=C(C)C=C4.Cl.Cl
Z32	Nicergoline	CO[C@@]([C@@]1([H])C2)(C[C@@H](COC(C3=CN=CC(Br)=C3)=O)CN1C)C4=C5C2=CN(C)C5=CC=C4
Z33	Fluvastatin (sodium)	O=C(O)C[C@@H](O)C[C@@H](O)/C=C/C(N1C(C)C)=C(C2=CC=C(F)C=C2)C3=C1C=CC=C3.[R].S.[Na+]
Z34	Vonoprazan Fumarate	FC(C=CC=C1)=C1C2=CC(CNC)=CN2S(=O)(C3=CC=CN=C3)=O.OC(/C=C/C(O)=O)=O
Pyrimidine
AA1	Fimasartan	O=C1N(C(CCCC)=NC(C)=C1CC(N(C)C)=S)CC2=CC=C(C3=C(C4=NN=NN4)C=CC=C3)C=C2
AA2	Trimethoprim	NC1=NC=C(CC2=CC(OC)=C(OC)C(OC)=C2)C(N)=N1
AA3	Pemetrexed (disodium hemipenta hydrate)	O=C([O-])CC[C@@H](C([O-])=O)NC(C1=CC=C(CCC2=CNC(N=C(N)N3)=C2C3=O)C=C1)=O.[Na+].[2.5H2O].[Na+]
AA4	Pemetrexed (disodium)	O=C1NC(N)=NC2=C1C(CCC3=CC=C(C(N[C@H](C([O-])=O)CCC([O-])=O)=O)C=C3)=CN2.[Na+].[Na+]
AA5	Sulfisomidin	O=S(C1=CC=C(N)C=C1)(NC2=NC(C)=NC(C)=C2)=O
AA6	Sulfamethazine	O=S(C1=CC=C(N)C=C1)(NC2=NC(C)=CC(C)=N2)=O
AA7	Sulfadiazine	O=S(C1=CC=C(N)C=C1)(NC2=NC=CC=N2)=O
AA8	Sulfamonomethoxine	O=S(C1=CC=C(N)C=C1)(NC2=NC=NC(OC)=C2)=O
AA9	Anagliptin	O=C(C1=CN2C(N=C1)=CC(C)=N2)NCC(C)(NCC(N3[C@H](C#N)CCC3)=O)C
AA10	Voriconazole	O[C@@]([C@@H](C)C1=NC=NC=C1F)(CN2N=CN=C2)C(C(F)=C3)=CC=C3F
AA11	Pemirolast (potassium)	O=C1C(C2=N[N-]N=N2)=CN=C3N1C=CC=C3C.[K+]
AA12	Baricitinib	N#CCC1(N2N=CC(C3=C4C(NC=C4)=NC=N3)=C2)CN(S(=O)(CC)=O)C1.O=P(O)(O)O
AA13	Carmofur	O=C(N(C(N1)=O)C=C(F)C1=O)NCCCCCC
AA14	Ticagrelor	O[C@H]1[C@@H](O)[C@H](N2N=NC3=C(N[C@H]4[C@H](C5=CC=C(F)C(F)=C5)C4)N=C(SCCC)N=C32)C[C@@H]1OCCO
AA15	Pyrantel (tartrate)	CN1CCCN=C1/C=C/C2=CC=CS2.O=C(O)[C@H](O)[C@@H](O)C(O)=O
AA16	Udenafil	O=S(C1=CC=C(OCCC)C(C2=NC3=C(N(C)N=C3CCC)C(N2)=O)=C1)(NCCC4N(C)CCC4)=O
AA17	Benfotiamine	CC1=NC=C(CN(/C(C)=C(CCOP(O)(O)=O)/SC(C2=CC=CC=C2)=O)C=O)C(N)=N1
Quinazoline
BB1	Erlotinib	C#CC1=CC=CC(NC2=NC=NC3=C2C=C(C(OCCOC)=C3)OCCOC)=C1
BB2	Erlotinib (Hydrochloride)	COCCOC1=CC2=NC=NC(NC3=CC=CC(C#C)=C3)=C2C=C1OCCOC.[H]Cl
BB3	Anagrelide (hydrochloride)	ClC1=C(CN(C2)C3=NC2=O)C(N3)=CC=C1Cl.Cl
Quinoline
CC1	Carteolol hydrochloride	O=C1NC2=C(C(OCC(O)CNC(C)(C)C)=CC=C2)CC1.Cl
CC2	Pitavastatin (Calcium)	O=C([O-])C[C@H](O)C[C@H](O)/C=C/C1=C(C2=CC=C(F)C=C2)C3=CC=CC=C3N=C1C4CC4.[0.5Ca2+]
CC3	Cilostazol	O=C1NC2=C(C=C(OCCCCC3=NN=NN3C4CCCCC4)C=C2)CC1
CC4	Diiodohydroxyquinoline	OC1=C2N=CC=CC2=C(I)C=C1I
CC5	Amodiaquin (dihydrochloride dihydrate)	OC1=CC=C(NC2=CC=NC3=CC(Cl)=CC=C23)C=C1CN(CC)CC.Cl.Cl.O.O
CC6	Elvitegravir	O=C(O)C1=CN(C2=C(C1=O)C=C(C(OC)=C2)CC3=CC=CC(Cl)=C3F)[C@@H](C(C)C)CO
CC7	Lenvatinib	O=C(N)C1=C(C=C2N=CC=C(C2=C1)OC3=CC=C(C(Cl)=C3)NC(NC4CC4)=O)OC
CC8	Pergolide (mesylate)	[H][C@@]1(N(CCC)C[C@H](CSC)C[C@@]12[H])CC3=CNC4=CC=CC2=C43.CS(=O)(O)=O
Pyrrole
DD1	Enalaprilat (dihydrate)	O=C(O)[C@H]1N(C([C@H](C)N[C@H](C(O)=O)CCC2=CC=CC=C2)=O)CCC1.O.O
DD2	Zofenopril (calcium)	O=C(N(C[C@@H](SC1=CC=CC=C1)C2)[C@@H]2C([O-])=O)[C@H](C)CSC(C3=CC=CC=C3)=O.[0.5Ca2+]
DD3	Clemastine (fumarate)	CN1[C@@H](CCO[C@](C2=CC=CC=C2)(C3=CC=C(Cl)C=C3)C)CCC1.O=C(O)/C=C/C(O)=O
DD4	Atorvastatin (hemicalcium salt)	FC1=CC=C(C2=C(C3=CC=CC=C3)C(C(NC4=CC=CC=C4)=O)=C(C(C)C)N2CC[C@@H](O)C[C@@H](O)CC([O-])=O)C=C1.[0.5Ca2+]
DD5	Clindamycin (hydrochloride)	C[C@H](Cl)[C@@]([C@@]([C@@H]([C@H](O)[C@H]1O)O)([H])O[C@@H]1SC)([H])NC([C@@H]2C[C@@H](CCC)CN2C)=O.Cl
DD6	Ethosuximide	O=C(C(C)(CC)C1)NC1=O
DD7	Tolmetin (sodium dihydrate)	O=C([O-])CC1=CC=C(C(C2=CC=C(C)C=C2)=O)N1C.[Na+].O.O
DD8	Vildagliptin	O[C@@]1(C2)C[C@H]3C[C@H](C[C@]2(NCC(N4[C@H](C#N)CCC4)=O)C3)C1
DD9	Amisulpride	CCN1C(CNC(C2=CC(S(=O)(CC)=O)=C(N)C=C2OC)=O)CCC1
DD10	Oxiracetam	O=C(N)CN1C(CC(O)C1)=O
DD11	Procyclidine (hydrochloride)	OC(C1=CC=CC=C1)(C2CCCCC2)CCN3CCCC3.[H]Cl
DD12	Levetiracetam	NC([C@@H](N(CCC1)C1=O)CC)=O
DD13	Pramiracetam	O=C(NCCN(C(C)C)C(C)C)CN1C(CCC1)=O
DD14	Glimepiride	O=C(N1C(C(CC)=C(C)C1)=O)NCCC2=CC=C(S(=O)(NC(N[C@H]3CC[C@H](C)CC3)=O)=O)C=C2
DD15	Oxytocin (acetate)	CC(O)=O.O=C([C@H](CSSC[C@@H](C(N[C@H](C1=O)CC2=CC=C(O)C=C2)=O)N)NC([C@@H](NC([C@@H](NC(C(N1)[C@@H](C)CC)=O)CCC(N)=O)=O)CC(N)=O)=O)N(CCC3)[C@@H]3C(N[C@@H](CC(C)C)C(NCC(N)=O)=O)=O
DD16	Bucladesine (calcium salt)	O=C(CCC)O[C@H]1[C@H](N2C(N=CN=C3NC(CCC)=O)=C3N=C2)O[C@@](CO4)([H])[C@@]1([H])OP4([O-])=O.[0.5Ca2+]
DD17	Gliclazide	O=S(C1=CC=C(C)C=C1)(NC(NN2CC3C(CCC3)C2)=O)=O
DD18	Terlipressin	O=C([C@H](CSSC[C@@H](C(N[C@H](C1=O)CC2=CC=C(O)C=C2)=O)NC(CNC(CNC(CN)=O)=O)=O)NC([C@@H](NC([C@@H](NC([C@](N1)([H])CC3=CC=CC=C3)=O)CCC(N)=O)=O)CC(N)=O)=O)N(CCC4)[C@@H]4C(N[C@@H](CCCCN)C(NCC(N)=O)=O)=O
Pyridazine
EE1	Amezinium (methylsulfate)	COC1=CC(N)=CN=[N+]1C2=CC=CC=C2.O=S(OC)([O-])=O
Cyclopenta[a]phenanthren
FF1	Exemestane	C[C@]1([C@](CC2)([H])[C@]3([H])CC(C4=CC(C=C[C@]4(C)[C@@]3([H])CC1)=O)=C)C2=O
FF2	Fludrocortisone (acetate)	C[C@@]12[C@](C(COC(C)=O)=O)(O)CC[C@@]1([H])[C@]3([H])CCC4=CC(CC[C@]4(C)[C@@]3(F)[C@@H](O)C2)=O
FF3	Megestrol (Acetate)	CC([C@@]1(OC(C)=O)CC[C@@]2([H])[C@]3([H])C=C(C)C4=CC(CC[C@]4(C)[C@@]3([H])CC[C@]12C)=O)=O
FF4	Chenodeoxycholic Acid	O=C(O)CC[C@@H](C)[C@]1([H])[C@]2(C)[C@](CC1)([H])[C@]3([H])[C@H](O)C[C@@](C4)([H])[C@@](CC[C@H]4O)(C)[C@]([H])3CC2
FF5	Hydrocortisone	C[C@@]1([C@@]2(O)C(CO)=O)[C@](CC2)([H])[C@@](CCC3=CC4=O)([H])[C@]([C@]3(CC4)C)([H])[C@@H](O)C1
FF6	Progesterone	CC([C@H]1CC[C@@]2([H])[C@]3([H])CCC4=CC(CC[C@]4(C)[C@@]3([H])CC[C@]12C)=O)=O
FF7	Estropipate	C[C@]1([C@](CC2)([H])[C@]3([H])CCC4=C(C=CC(OS(=O)(O)=O)=C4)[C@@]3([H])CC1)C2=O.N5CCNCC5
FF8	Prednisone	C[C@@]1(C2)[C@](C(CO)=O)(O)CC[C@@]1([H])[C@]3([H])CCC4=CC(C=C[C@]4(C)[C@@]3([H])C2=O)=O
FF9	Clobetasol propionate	C[C@@]12[C@](C(CCl)=O)(OC(CC)=O)[C@@H](C)C[C@@]1([H])[C@]3([H])CCC4=CC(C=C[C@]4(C)[C@@]3(F)[C@@H](O)C2)=O
FF10	Hydrocortisone (acetate)	C[C@@]12[C@](C(COC(C)=O)=O)(O)CC[C@@]1([H])[C@]3([H])CCC4=CC(CC[C@]4(C)[C@@]3([H])[C@@H](O)C2)=O
FF11	Prednisolone (disodium phosphate)	C[C@@]1([C@@]2(O)C(COP([O-])([O-])=O)=O)[C@](CC2)([H])[C@@](CCC3=CC4=O)([H])[C@]([C@]3(C=C4)C)([H])[C@@H](O)C1.[Na+].[Na+]
FF12	Dexamethasone phosphate disodium	O=C1C=C[C@@]2(C)C(CC[C@]3([H])[C@]2(F)[C@@H](O)C[C@@]4(C)[C@@]3([H])C[C@@H](C)[C@]4(O)C(COP([O-])([O-])=O)=O)=C1.[Na+].[Na+]
FF13	Triamcinolone	O=C([C@]([C@@]1([H])C[C@@]2([H])[C@@](CCC3=CC4=O)([H])[C@@](F)([C@]3(C=C4)C)[C@@H](O)C5)(OC(C)(C)O1)[C@]25C)CO
FF14	Mometasone furoate	C[C@@]12[C@](C(CCl)=O)(OC(C3=CC=CO3)=O)[C@H](C)C[C@@]1([H])[C@]4([H])CCC5=CC(C=C[C@]5(C)[C@@]4(Cl)[C@@H](O)C2)=O
FF15	Canrenone	C[C@@]12[C@]3(CCC(O3)=O)CC[C@@]1([H])[C@]4([H])C=CC5=CC(CC[C@]5(C)[C@@]4([H])CC2)=O
FF16	Digoxin	O[C@]([C@@](CC[C@@]1([H])[C@@]2(CC[C@H](O[C@@](O[C@H](C)[C@H]3O[C@@](O[C@H](C)[C@H]4O[C@@](O[C@H](C)[C@H]5O)([H])C[C@@H]5O)([H])C[C@@H]4O)([H])C[C@@H]3O)C1)C)([H])[C@]2([H])C[C@H]6O)(CC[C@@H]7C(CO8)=CC8=O)[C@]67C
FF17	Flumethasone	C[C@@]12[C@](C(CO)=O)(O)[C@H](C)C[C@@]1([H])[C@]3([H])C[C@H](F)C4=CC(C=C[C@]4(C)[C@@]3(F)[C@@H](O)C2)=O
FF18	Hydroxyprogesterone caproate	CC([C@@]1(OC(CCCCC)=O)CC[C@@]2([H])[C@]3([H])CCC4=CC(CC[C@]4(C)[C@@]3([H])CC[C@]12C)=O)=O
FF19	Difluprednate	O=C([C@]([C@]12C)(CC[C@@]1([H])[C@@](C[C@H](F)C3=CC4=O)([H])[C@@](F)([C@]3(C=C4)C)[C@@H](O)C2)OC(CCC)=O)COC(C)=O
FF20	Prednisolone (21-acetate)	C[C@@]12[C@](C(COC(C)=O)=O)(O)CC[C@@]1([H])[C@]3([H])CCC4=CC(C=C[C@]4(C)[C@@]3([H])[C@@H](O)C2)=O
FF21	Ethynodiol (diacetate)	C#C[C@]1(OC(C)=O)CC[C@@]2([H])[C@]3([H])CCC4=C[C@@H](OC(C)=O)CC[C@]4([H])[C@@]3([H])CC[C@]12C
FF22	Norethindrone acetate	C#C[C@]1(OC(C)=O)CC[C@@]2([H])[C@]3([H])CCC4=CC(CC[C@]4([H])[C@@]3([H])CC[C@]12C)=O
FF23	Medroxyprogesterone (acetate)	CC(O[C@@]([C@]12C)(CC[C@@]1([H])[C@@](C[C@H](C)C3=CC4=O)([H])[C@]([C@]3(CC4)C)([H])CC2)C(C)=O)=O
Azabicyclo[3.2.1]octan
GG1	Atropine (sulfate monohydrate)	OS(O)(=O)=O.O=C(C(C1=CC=CC=C1)CO)O[C@H]2C[C@@H](CC3)N(C)[C@@H]3C2.[0.5]
GG2	Retapamulin	C[C@@H]1[C@]23[C@](C(CC3)=O)([H])[C@]([C@H](OC(CS[C@@H]4C[C@@H]5N(C)[C@@H](CC5)C4)=O)C[C@](C=C)(C)[C@H]1O)([C@H](C)CC2)C
GG3	Atropine	O=C(O[C@@H]1C[C@@H](N2C)CC[C@@H]2C1)C(CO)C3=CC=CC=C3
GG4	Homatropine (Bromide)	O=C(C(C1=CC=CC=C1)O)O[C@H]2C[C@@H](CC3)N(C)[C@@H]3C2.Br
GG5	Tropisetron	O=C(C1=CNC2=C1C=CC=C2)O[C@H]3C[C@H]4CC[C@H](N4C)C3
GG6	Tropisetron (Hydrochloride)	O=C(C1=CNC2=C1C=CC=C2)O[C@H]3C[C@H]4CC[C@H](N4C)C3.[H]Cl
Azabicyclo[2.2.2]octan
GG7	Cevimeline (hydrochloride)	C[C@H]1SC[C@@]2(CN3CCC2CC3)O1.Cl
GG8	Cevimeline (hydrochloride hemihydrate)	C[C@H](SC1)O[C@]21CN3CCC2CC3.C[C@@H](SC4)O[C@@]54CN6CCC5CC6.[H]Cl.[0.5 H2O]
GG9	Hydroquinidine	O[C@H]([C@]1([H])[N@@](CC2)C[C@H](CC)[C@@H]2C1)C3=CC=NC4=CC=C(OC)C=C34
GG10	Quinidine	C=C[C@H]1C[N@](CC[C@H]1C2)[C@@]2([H])[C@@H](O)C3=CC=NC4=CC=C(OC)C=C34
Azabicyclo[3.2.0]hept
GG11	Faropenem daloxate	O=C(N1[C@@]2(SC([C@@H]3OCCC3)=C1C(OCC4=C(OC(O4)=O)C)=O)[H])[C@]2([H])[C@H](O)C
GG12	Meropenem (trihydrate)	O=C(C(N12)=C(S[C@@H]3CN[C@H](C(N(C)C)=O)C3)[C@H](C)[C@]2([H])[C@@H]([C@H](O)C)C1=O)O.O.O.O
Azabicyclo[3.1.0]hexane
GG13	Saxagliptin	N#C[C@@H]1C[C@]2([H])[C@](C2)([H])N1C([C@H]([C@@]34C[C@@H]5C[C@H](C4)C[C@](C5)(O)C3)N)=O
Azabicyclo[2.2.1]heptan
GG14	Ledipasvir (D-tartrate)	O=C(OC)N[C@H](C(N([C@H](C1=NC=C(C2=CC(C(F)(F)C3=C4C=CC(C5=CC=C6N=C([C@H]7N(C([C@@H](NC(OC)=O)C(C)C)=O)[C@]8([H])CC[C@@]7([H])C8)NC6=C5)=C3)=C4C=C2)N1)C9)CC%109CC%10)=O)C(C)C.O[C@@H]([C@@H](C(O)=O)O)C(O)=O
Hydrazine
HH1	Hydralazine (hydrochloride)	NNC1=NN=CC2=C1C=CC=C2.Cl
Anilino
II1	Chlorhexidine (digluconate)	N=C(NC(NCCCCCCNC(NC(NC1=CC=C(Cl)C=C1)=N)=N)=N)NC2=CC=C(Cl)C=C2.O[C@H]([C@@H](O)C(O)=O)[C@H](O)[C@H](O)CO.O[C@H]([C@@H](O)C(O)=O)[C@H](O)[C@H](O)CO
II2	Diclofenac (Sodium)	[O-]C(CC1=CC=CC=C1NC2=C(Cl)C=CC=C2Cl)=O.[Na+]
II3	Diclofenac	O=C(O)CC1=CC=CC=C1NC2=C(Cl)C=CC=C2Cl
II4	Tolfenamic Acid	O=C(O)C1=CC=CC=C1NC2=C(C)C(Cl)=CC=C2
Carbamodithioate
JJ1	Disulfiram	S=C(SSC(N(CC)CC)=S)N(CC)CC
Inden
KK1	Rasagiline (mesylate)	CS(=O)(O)=O.C#CCN[C@H]1C2=CC=CC=C2CC1
Azatetracyclo
LL1	Asenapine (maleate)	CN1C[C@]2([H])C3=CC=CC=C3OC4=CC=C(Cl)C=C4[C@]2(C1)[H].O=C(O)/C=C\C(O)=O
LL2	Setiptiline	CN1CC2=C(CC1)C3=CC=CC=C3CC4=C2C=CC=C4
LL3	Galanthamine (hydrobromide)	O[C@@H]1C[C@@H]2OC3=C4C(CN(C)CC[C@]42C=C1)=CC=C3OC.Br
Azoniatricyclo
LL4	Tiotropium (Bromide)	O=C(C(C1=CC=CS1)(O)C2=CC=CS2)O[C@H]3C[C@H]([N+]4(C)C)[C@@H]5O[C@@H]5[C@H]4C3.[Br-]
LL5	Methscopolamine (bromide)	O[C@@H]1C[C@@H]2OC3=C4C(CN(C)CC[C@]42C=C1)=CC=C3OC.Br
Oxapentacyclo
LL6	Trilostane	OC1=C(C#N)C[C@@]2(C)[C@@]3(CC[C@]4([H])[C@]2([H])CC[C@@]5(C)[C@@]4([H])CC[C@@H]5O)[C@@H]1O3
LL7	Cinobufotalin	C[C@]([C@@H](C(C=C1)=COC1=O)[C@H]2OC(C)=O)(CC[C@@]3([H])[C@@]4([H])CC[C@@]5(O)[C@@]3(CC[C@H](O)C5)C)[C@@]64[C@@H]2O6
Azoniabicyclo
LL8	Homatropine (methylbromide)	C[N+]1([C@@H]2C[C@@H](OC(C(O)C3=CC=CC=C3)=O)C[C@H]1CC2)C.[Br-]
Sulfonamide
MM1	Mafenide (Acetate)	O=S(C1=CC=C(CN)C=C1)(N)=O.CC(O)=O
MM2	Sulfanilamide	O=S(C1=CC=C(N)C=C1)(N)=O
MM3	Brinzolamide	O=S(C(S1)=CC2=C1S(N(CCCOC)C[C@@H]2NCC)(=O)=O)(N)=O
MM4	Dorzolamide (hydrochloride)	O=S(C(S1)=CC2=C1S([C@@H](C)C[C@@H]2NCC)(=O)=O)(N)=O.Cl
MM5	Meticrane	O=S(C1=C(C)C=C(C2=C1)CCCS2(=O)=O)(N)=O
Benzoylphenyl
NN1	Ketoprofen	O=C(C1=CC=CC([C@@H](C(O)=O)C)=C1)C2=CC=CC=C2
NN2	Nepafenac	O=C(N)CC1=CC=CC(C(C2=CC=CC=C2)=O)=C1N
Cyclohexan
OO1	Voglibose	O[C@@H]1[C@@](O)(CO)C[C@H](NC(CO)CO)[C@H](O)[C@H]1O
OO2	Terpin (hydrate)	O[C@]1(C)CC[C@H](C(C)(C)O)CC1.O
OO3	Nateglinide	O=C(O)[C@@H](CC1=CC=CC=C1)NC([C@H]2CC[C@H](C(C)C)CC2)=O
OO4	Venlafaxine (hydrochloride)	OC1(C(C2=CC=C(OC)C=C2)CN(C)C)CCCCC1.Cl
Anthracene-9_10-dione
PP1	'Danthron	O=C1C2=C(C=CC=C2O)C(C3=CC=CC(O)=C13)=O
Pentanoic acid
QQ1	Aceglutamide	O=C(N)CC[C@@H](C(O)=O)NC(C)=O
QQ2	Acetylleucine	CC(C)CC(C(O)=O)NC(C)=O
Oxane
RR1	Bekanamycin	O[C@H]1[C@](O[C@H]2[C@H](N)C[C@H](N)[C@@H](O[C@@]3([H])O[C@H](CN)[C@@H](O)[C@H](O)[C@H]3N)[C@@H]2O)([H])O[C@H](CO)[C@@H](O)[C@@H]1N
RR2	Dextrose	O=C[C@@H]([C@H]([C@@H]([C@@H](CO)O)O)O)O
RR3	Gastrodin	O[C@H]([C@H]([C@@H]([C@@H](CO)O1)O)O)[C@@H]1OC2=CC=C(CO)C=C2
RR4	Canagliflozin (hemihydrate)	CC1=CC=C([C@H]2[C@H](O)[C@@H](O)[C@H](O)[C@@H](CO)O2)C=C1CC3=CC=C(C4=CC=C(F)C=C4)S3.[0.5H2O]
RR5	Canagliflozin	CC1=CC=C([C@H]2[C@H](O)[C@@H](O)[C@H](O)[C@@H](CO)O2)C=C1CC3=CC=C(C4=CC=C(F)C=C4)S3.[0.5H2O]
1-nitrosourea
SS1	Lomustine	O=C(NC1CCCCC1)N(CCCl)N=O
SS2	Carmustine	O=C(NCCCl)N(CCCl)N=O
1,4-thiazepan
TT1	Temocapril (hydrochloride)	O=C(O)CN1C[C@@H](C2=CC=CS2)SC[C@H](N[C@H](C(OCC)=O)CCC3=CC=CC=C3)C1=O.Cl
15,17-diazatricyclo[10.8.0.014,19]icosa
UU1	Icotinib (Hydrochloride)	C#CC1=CC(NC2=C(C=C(OCCOCCOCCO3)C3=C4)C4=NC=N2)=CC=C1.[H]Cl
UU2	Icotinib	C#CC1=CC(NC2=C(C=C(OCCOCCOCCO3)C3=C4)C4=NC=N2)=CC=C1
Azatricyclo[7.3.1.02,7]trideca
UU3	(-)-Huperzine A	O=C1NC2=C([C@@](/C3=C\C)(N)CC(C)=C[C@@]3([H])C2)C=C1
1,8-diazatricyclo[8.4.0.03,8]tetradeca
UU4	Dolutegravir	O=C(C1=CN(C2=C([O-])C1=O)C[C@]3([H])OCC[C@@H](C)N3C2=O)NCC4=CC=C(F)C=C4F.[Na+]
2,4,9,15-tetrazatricyclo[9.4.0.03,8]pentadeca
UU5	Dolasetron (Mesylate hydrate)	O=C(C1=CNC2=C1C=CC=C2)O[C@@H]3C[C@@](CC4C5)([H])[N@](CC4=O)[C@@]5([H])C3.O=S(C)(O)=O.O
